# Supplementary material for: Effect of occupational exposure to petrol and gasoline components on liver and renal biochemical parameters among gas station attendants, a review and meta-analysis
Source: publisher site journal article supplement (doi:10.1515/reveh-2019-0107), 2020-08-27
Supplement: Supplementary file 1 [file j_reveh-2019-0107_suppl.docx]

Supplementary 1: The results of the: Risk of Bias assessment” for the primary studies entered into the meta-analysis

| **Reference** | **Selection** | | | | **Comparability** | | **Exposure** | | | Overall risk of bias score (of a maximum of 9) |
| --- | --- | --- | --- | --- | --- | --- | --- | --- | --- | --- |
| |  | | --- |   Representativeness of the exposed cohort | Selection of non-expose cohort | Ascertainment of exposure | Demonstration that outcome of interest was not present at the start of the study | | Comparability f cohorts on the basis of the design or analysis | | --- | | | Assessment of outcome | Was follow-up long enough for outcomes to occur? | Adequacy of follow up of cohorts |
| Study controls for the most important factor | Study controls for  for any additional factor |
| Eltom(45)(2017)  Sudan, Khartoum state | * | * |  | * | * | * | * |  | * | 7 |
| Akinosun(2006)(20)  Nigeria | * | * |  | * | |  | | --- | | * | * |  | * | 6 |
| Gali(2012)446)  Nigeria | * | * |  | * |  |  | * |  | * | 5 |
| Ali Mahmood(2012)(47)  Sulaimaniya, Iraq | * | * |  | * |  | * | * |  | * | 6 |
| Pranjic(2002)(48)  Tuzla, Bosnia and Herzegovina | * | * | * | * |  |  | * | * | * | 7 |
| Mohammed(2014)(49)  Sulaimaniya, Iraq | * | * | * | * |  | * | * | * | * | 8 |
| Ahmed(2016)(50)  Khartoum State,Sudan | * | * |  | * | * | * | * | * | * | 8 |
| Neghab(2015)(21)  Shiraz,Iran | * | * | * | * | * | * | * |  | * | 8 |
| Nwanjo(2007)(17)  Owerri, Imo State, Nigeria | * | * |  | * |  |  | * |  | * | 5 |
| Ogunneye(2104)(51)  Ibadan, Nigeria | * | * |  | * |  |  | * |  | * | 5 |
| Rahul(2017)(52)  Jaipur, Rajasthan, India | * | * |  | * | * | * | * | * | * | 8 |
| Sirdah(2103)(53)  Gaza | * | * |  | * |  | * | * |  | * | 6 |
| Soni(2016)(54)  South Haryana, India | * | * |  | * | * |  | * |  | * | 6 |
| Mashael(2017)(55)  Riyadh, Saudi Arabia | * | * |  | * |  |  | * |  | * | 5 |
| Khaled(2010)(56)  Egypt | * | * | * | * |  | * | * |  | * | 7 |
| Noory(2007)(57)  Iraqi, District of Baqub |  | * |  | * | * |  | * |  | * | 5 |
| Moro (2017)(58)  Rio Grande do Sul, Brazil |  | * | * | * |  |  | * |  | * | 5 |
| Abdel Azia(2006)(59)  Gaza Strip. |  | * | * | * |  |  | * |  | * | 5 |
| Aktinowa(2005) (60)  Lagos,Nigeria | * | * |  | * |  |  | * |  | * | 5 |
| Abou-ElWafa(2015) Egypt,Mansoura city(6) | * | * |  | * |  |  | * | * | * | 6 |
| Festus(2013) Owerri, Imo State, Nigeria(61) | * | * |  | * |  |  | * |  | * | 5 |
| Akram(2017) El-obeyed, North Kordofan State, Sudan (62) | * | * |  | * |  | * | * | * | * | 7 |
